# Supplementary material for: Ag(i)-based high-energy metal organic frameworks (HE-MOFs) incorporating coordinated moieties in channels: synthesis, structure and physicochemical properties
Source: Royal Society of Chemistry journal article supplement (doi:10.1039/c6ra21132a), 2016-01-01
Supplement: c6ra21132a1.pdf [file c6ra21132a1.pdf]

## Supporting Information

### Ag(I)-based high-energy metal organic frameworks (HE-MOFs) incorporating the coordinated moieties in channels: Synthesis, structure and physicochemical properties

Xiaxia Song,<sup>#[a]</sup> Sheng Zhang,<sup>#[a,b]</sup> Guowei Zhao,<sup>[a]</sup> Wendou Zhang,<sup>[a]</sup> Dongpo Chen,<sup>[a]</sup> Qi Yang,<sup>\*[a]</sup> Qing Wei,<sup>[a]</sup> Gang Xie,<sup>[a]</sup> Desuo Yang,<sup>[b]</sup> Sanping Chen,<sup>\*[a]</sup> Shengli Gao<sup>[a]</sup>

<sup>a</sup> Key Laboratory of Synthetic and Natural Functional Molecule Chemistry of Ministry of Education, College of Chemistry and Materials Science, Northwest University, Xi'an, Shaanxi 710127, P.R. China. E-mail: [yangqi@nwu.edu.cn](mailto:yangqi@nwu.edu.cn), [sanpingchen@126.com](mailto:sanpingchen@126.com)

<sup>b</sup> College of Chemistry and Chemical Engineering, Baoji University of Arts and Sciences, Baoji 721013, P.R. China

<sup>#</sup>These authors contributed equally to this work.

**Table S1.** Selected bond lengths (Å) and angles (°) for **1**.

|                       |          |                     |           |
|-----------------------|----------|---------------------|-----------|
| Ag(1)-N(5)            | 2.219(7) | Ag(1)-N(3)          | 2.246(7)  |
| Ag(1)-O(2)            | 2.591(7) | Ag(1)-O(4)          | 2.613(7)  |
| Ag(2)-N(12)           | 2.187(7) | Ag(2)-N(12)#1       | 2.187(7)  |
| C(8)-O(4)#2           | 1.260(9) | N(1)-N(1)#3         | 1.291(13) |
| N(5)-Ag(1)-O(2)       | 117.5(3) | N(3)-Ag(1)-O(2)     | 87.5(2)   |
| O(2)-Ag(1)-O(4)       | 75.7(2)  | N(12)-Ag(2)-N(12)#1 | 180.0(3)  |
| N(4)-N(3)-Ag(1)       | 122.5(5) | C(1)-N(3)-Ag(1)     | 129.7(7)  |
| C(3)-N(5)-Ag(1)       | 131.2(7) | N(6)-N(5)-Ag(1)     | 120.6(5)  |
| N(11)-N(12)-<br>Ag(2) | 117.8(5) | C(6)-N(12)-Ag(2)    | 131.5(6)  |
| N(13)-O(2)-Ag(1)      | 102.8(5) | C(8)-O(4)-Ag(1)     | 111.3(5)  |

Symmetry transformations used to generate equivalent atoms for **1**:

#1 -x,-y,-z; #2 -x+1,y,-z+1/2; #3 -x+3/2,-y+3/2,-z+1.

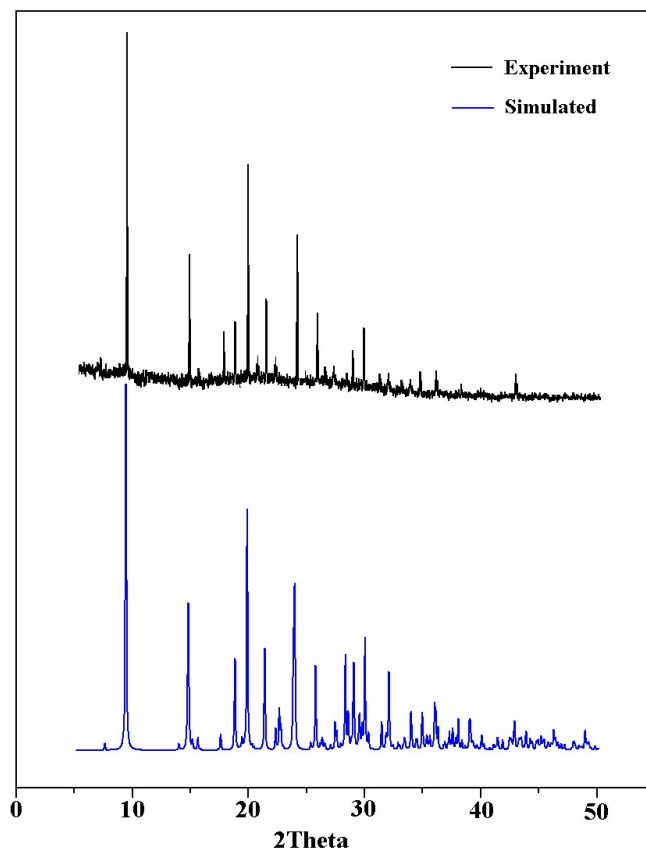

**Figure S1.** X-ray powder diffraction pattern of **1**.
